# Supplementary material
Source: Springer Nature journal article supplement (https://www.springermedizin.de/resource/supplementary/12884_2008_201_MOESM1_ESM.pdf/9459888)
Supplement: MOESM1 [file 9459888]

- ✓ Provided in Chinese languages
- ✓ Provided information that was supported by peer-reviewed and published research
- ✓ Available from one source
- ✓ Culturally specific
- ✓ Included preventative measures
- ✓ Open outside of office hours
- ✓ Accessible to extended family
